# Supplementary material
Source: Royal Society of Chemistry journal article supplement (doi:10.1039/d6cp00399k)
Supplement: d6cp00399k1.pdf [file d6cp00399k1.pdf]

## Supporting Information

### Theoretical design of one-dimensional dual site metal-organic framework ribbon for CO<sub>2</sub>RR

Zhen Feng,<sup>\*a, b, c</sup> Weihui Wang,<sup>b</sup> Xiangrui Ren,<sup>b</sup> Chengyan Li,<sup>b</sup> Zhiyuan Zhang,<sup>b, c</sup> Zhanyong Guo,<sup>\*b</sup> and Xianqi Dai<sup>\*a</sup>

---

<sup>a</sup> School of Chemistry and Chemical Engineering, School of Physics, Henan Normal University, Xinxiang, Henan 453007, China.

<sup>b</sup> School of Materials Science and Engineering, Henan Engineering Research Center for Modification Technology of Metal Materials, Xinxiang Engineering Research Center for Advanced Energy Storage Batteries and Materials, Xinxiang, Henan 453000, China.

<sup>c</sup> National United Engineering Laboratory for Advanced Bearing Tribology, Henan University of Science and Technology, Luoyang, Henan 471023, China.

\* Corresponding author.

E-mail: fengzhen27@126.com (Z. Feng), 15090072673@hait.edu.cn (Z. Guo), xqdai@htu.cn (X. Dai).

†Electronic Supplementary Information (ESI) available: see DOI:10.1039/x0xx00000x

## Supplementary Figures

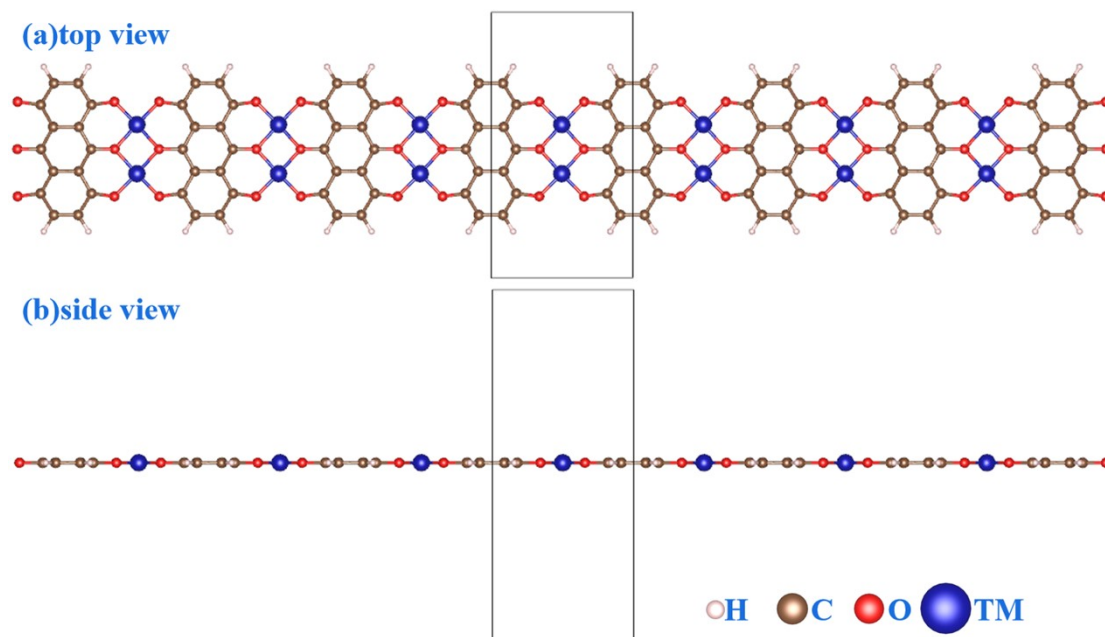

**Fig. S1.** Atomic configuration of  $\text{TM}_2$ -MOF monolayer.

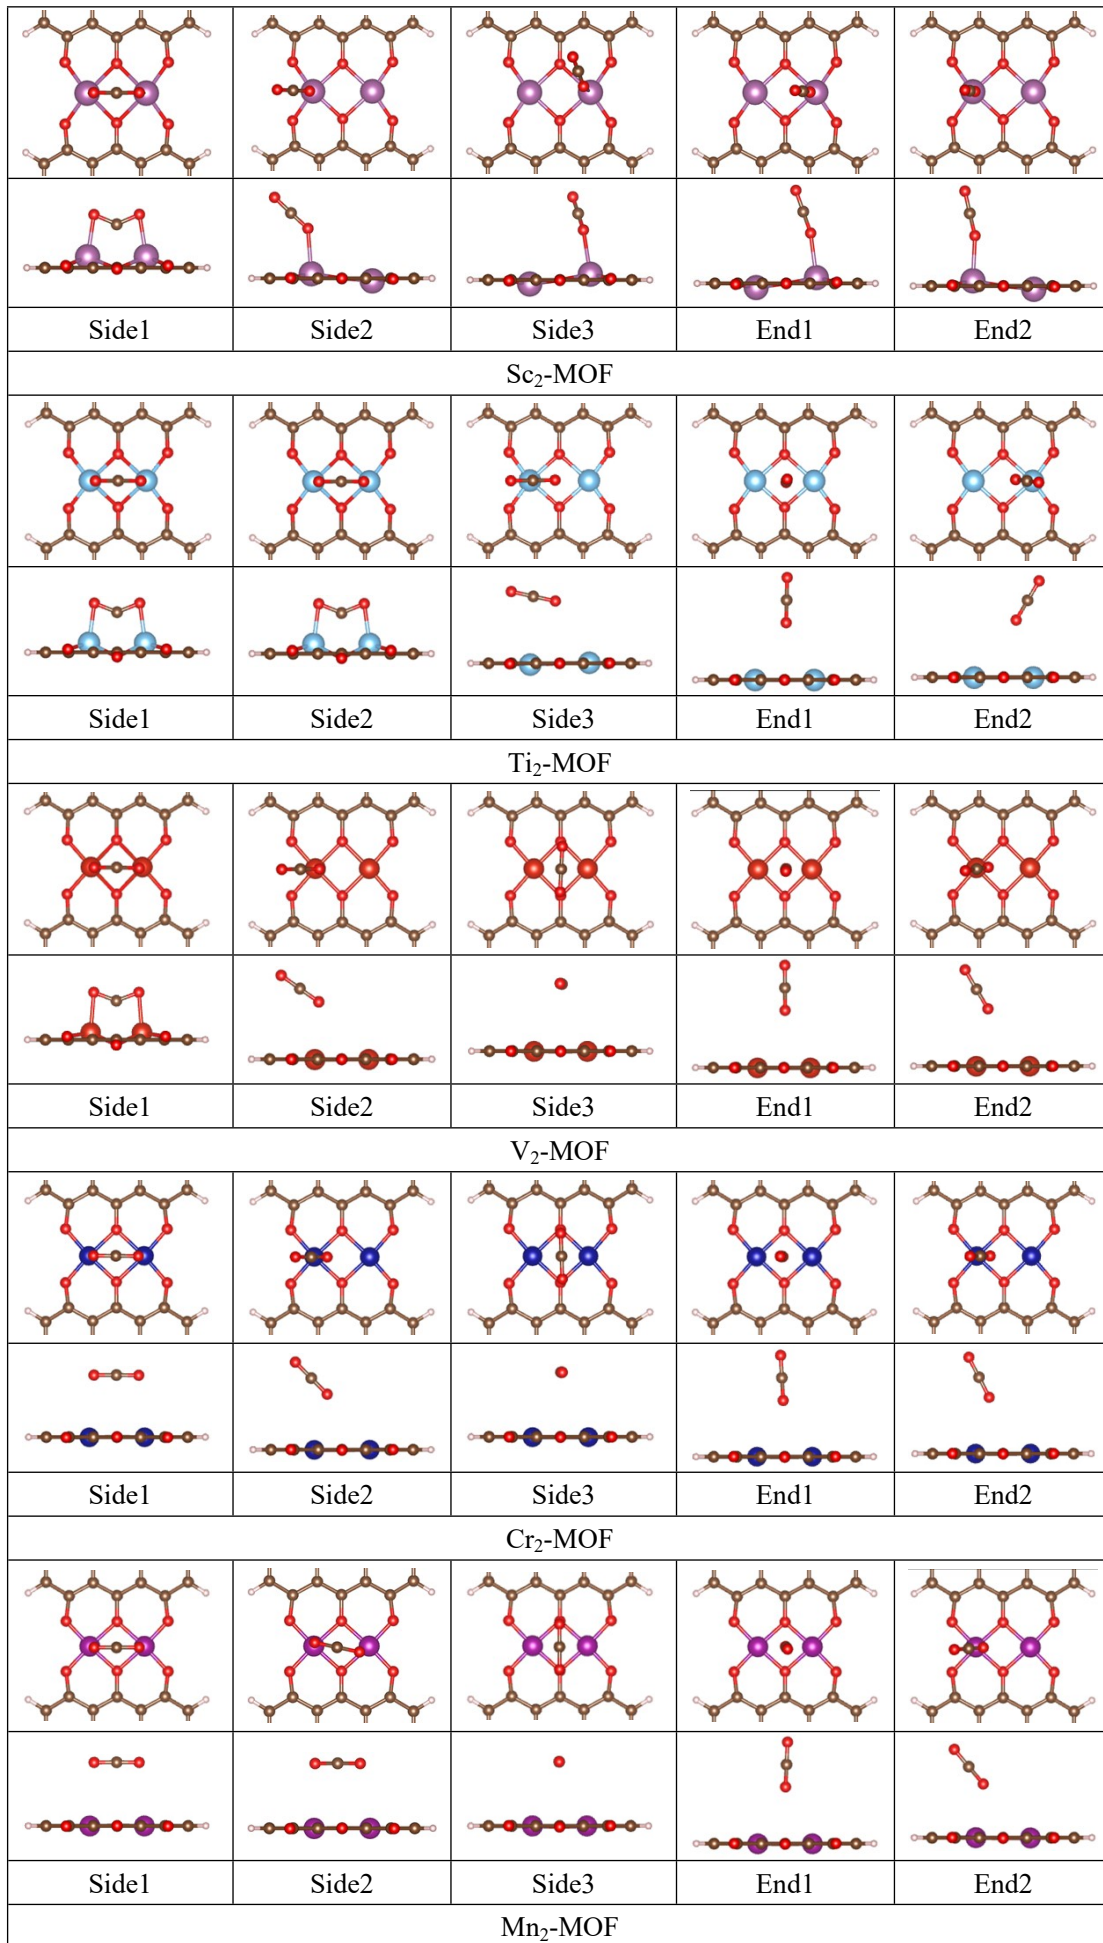

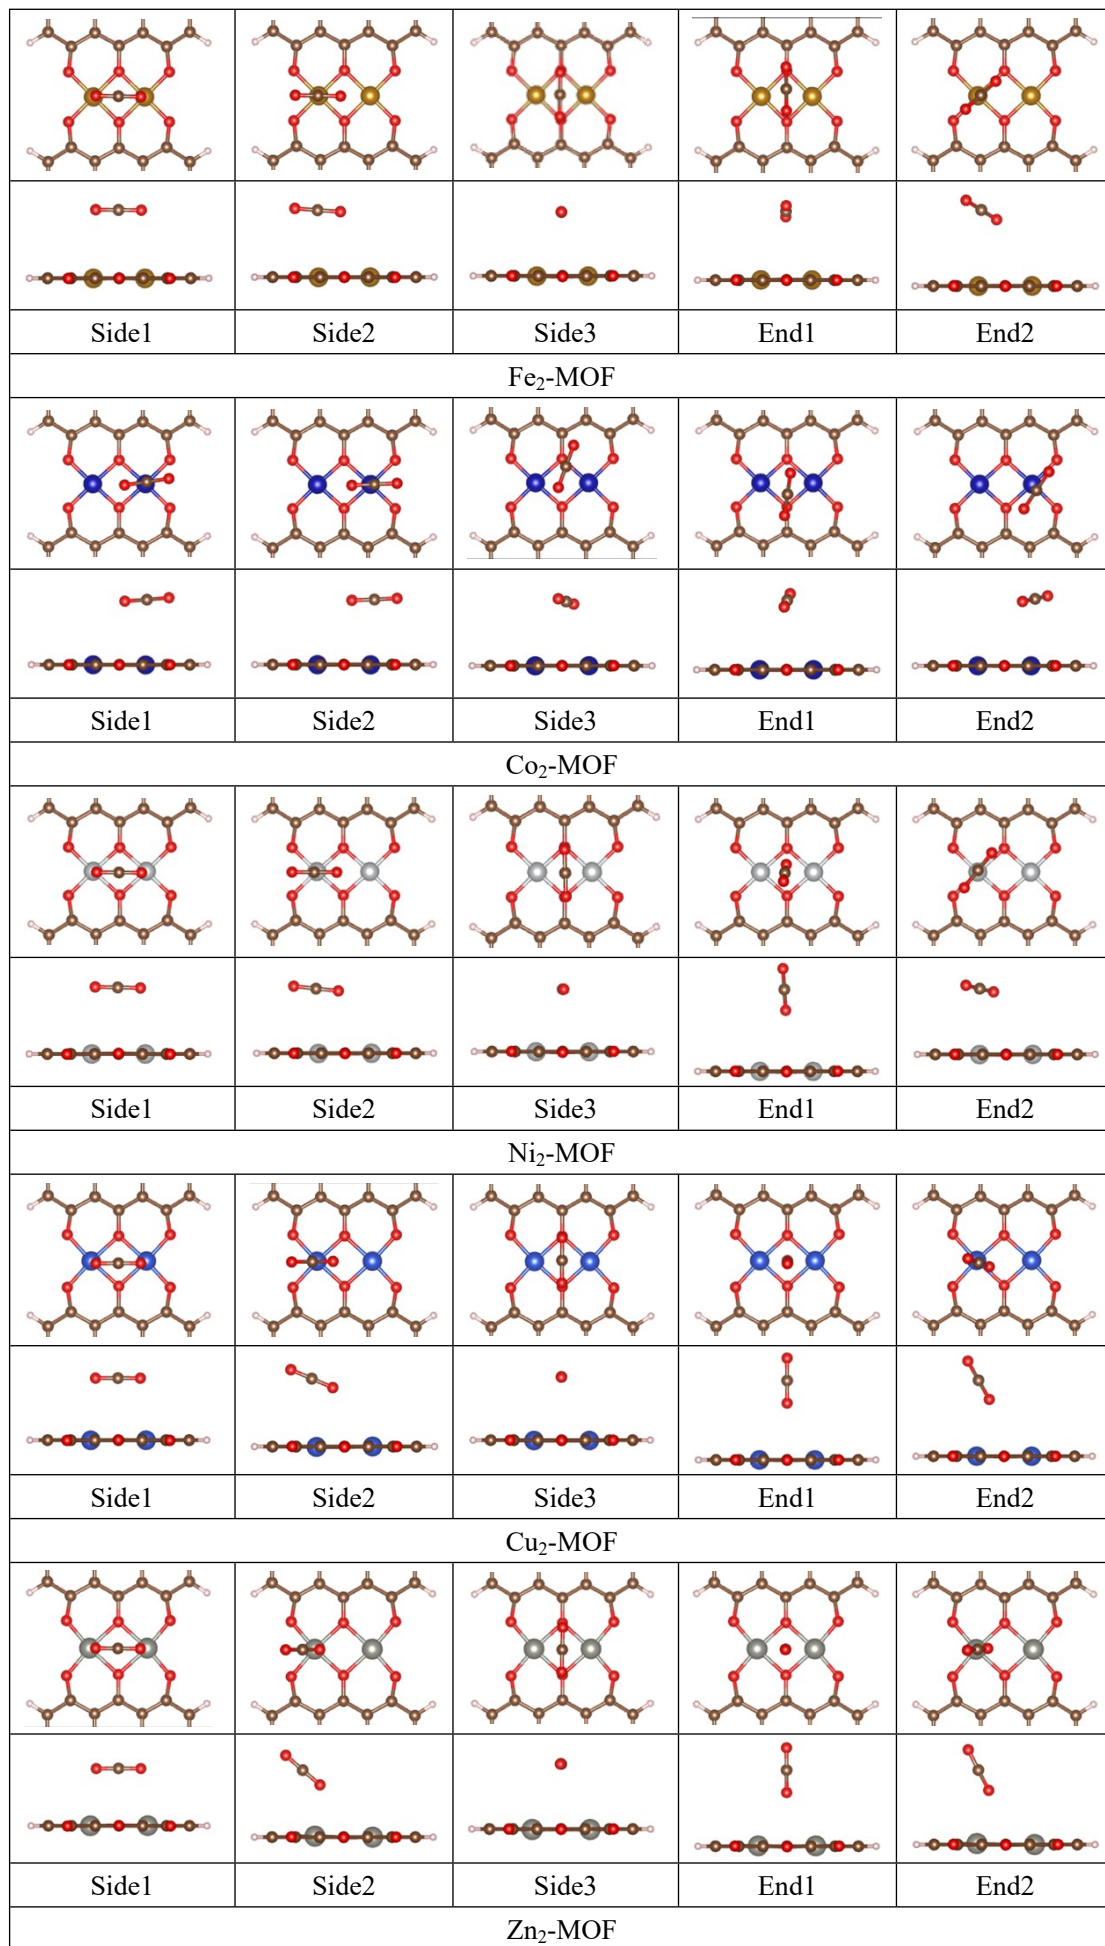

**Fig. S2.** Optimized configuration of CO<sub>2</sub> molecule adsorbed on pristine TM<sub>2</sub>-MOF.

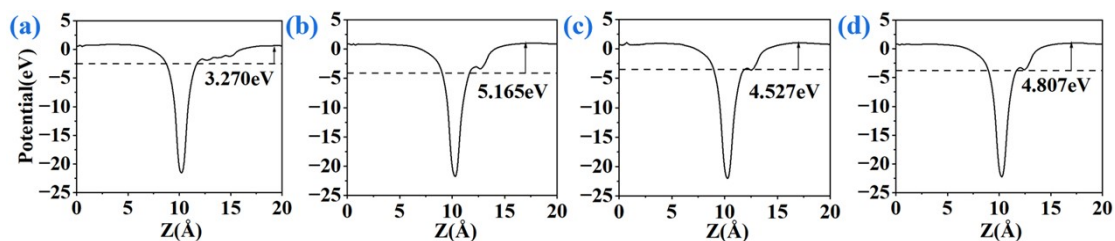

**Fig. S3.** Work function of (a) CO<sub>2</sub>-end on Sc<sub>2</sub>-MOF, (b) CO<sub>2</sub>-side on Sc<sub>2</sub>-MOF, (c) CO<sub>2</sub>-side on Ti<sub>2</sub>-MOF, (d) CO<sub>2</sub>-side on V<sub>2</sub>-MOF.

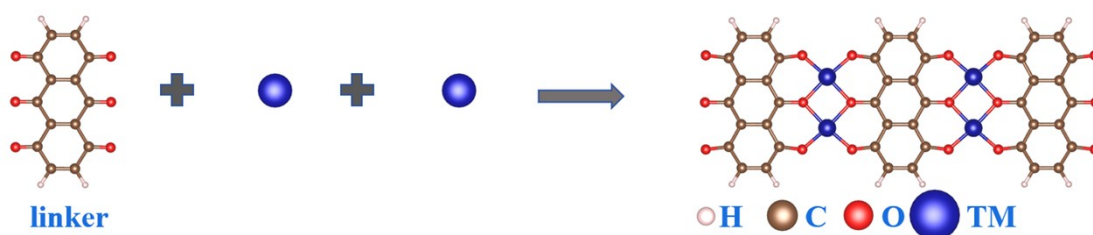

**Fig. S4.** Synthesis process of TM<sub>2</sub>-MOF monolayer, Linker + 2TM → TM<sub>2</sub>-MOF.

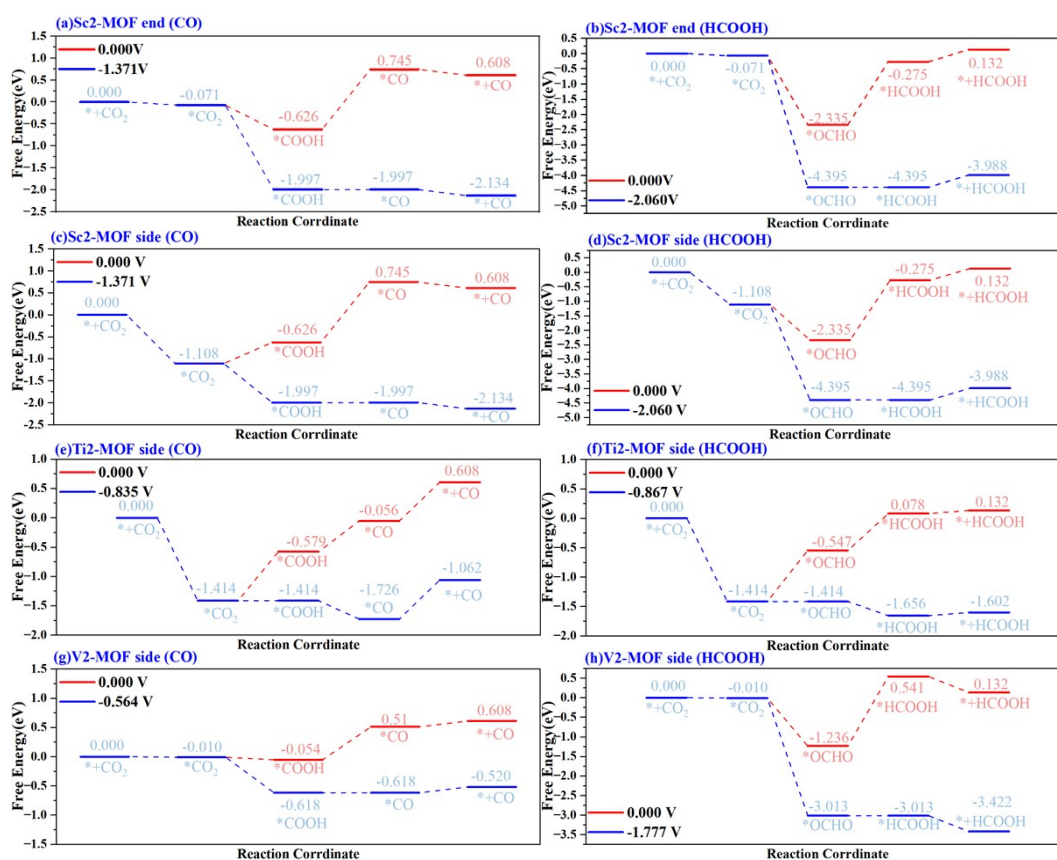

**Fig. S5.** Free energy diagrams at zero and applied potentials for (a) Sc<sub>2</sub>-MOF end CO, (b) Sc<sub>2</sub>-MOF end HCOOH, (c) Sc<sub>2</sub>-MOF side CO, (d) Sc<sub>2</sub>-MOF side HCOOH, (e) Ti<sub>2</sub>-MOF side CO, (f) Ti<sub>2</sub>-MOF side HCOOH, (g) V<sub>2</sub>-MOF side CO, (h) V<sub>2</sub>-MOF side HCOOH structures.

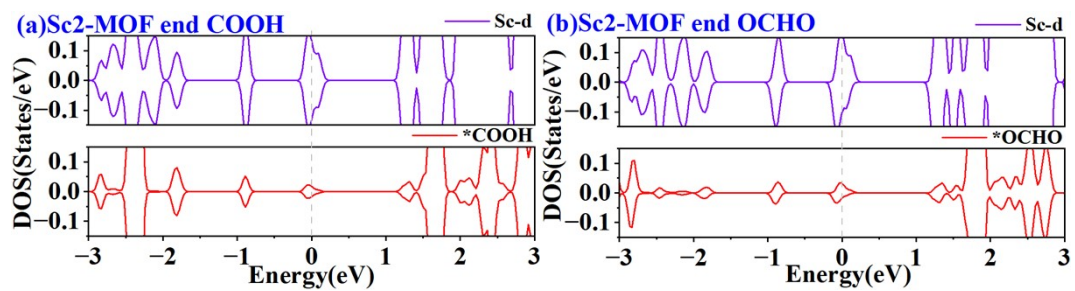

**Fig. S6.** PDOS of TM and LDOS of COOH or OCHO in (a)  $\text{Sc}_2\text{-MOF end COOH}$ , (b)  $\text{Sc}_2\text{-MOF end OCHO}$  structures.

## Supplementary Tables

**Table S1** Specific applied  $U$  value ( $U_{\text{eff}}$ ) of 3d metals for DFT calculations [1].

| 3d               | Sc   | Ti   | V    | Cr   | Mn   | Fe   | Co   | Ni   | Cu   | Zn   |
|------------------|------|------|------|------|------|------|------|------|------|------|
| $U_{\text{eff}}$ | 2.11 | 2.58 | 2.73 | 2.79 | 3.06 | 3.29 | 3.42 | 3.40 | 3.87 | 4.12 |

**Table S2** Contributions to the adsorbate free energy from zero-point energy correction ( $ZPE$ ), enthalpic temperature correction, and entropy contribution (at 300 K), respectively.

| Species         | $\Delta ZPE$ (eV) | $\int C_p dT$ (eV) | $T\Delta S$ (eV) |
|-----------------|-------------------|--------------------|------------------|
| CO              | 0.14              | 0.09               | 0.57             |
| CO <sub>2</sub> | 0.31              | 0.10               | 0.57             |
| HCOOH           | 0.90              | 0.16               | 0.59             |
| H <sub>2</sub>  | 0.27              | 0.09               | 0.42             |
| *H              | 0.27              | 0.005              | 0.006            |
| *COOH           | 0.659             | 0.079              | 0.154            |
| *OCHO           | 0.665             | 0.065              | 0.118            |
| *HCOOH          | 0.943             | 0.102              | 0.218            |
| *CO             | 0.253             | 0.046              | 0.085            |

## References

- [1] I V Solovyev, P H Dederichs, V I Anisimov, Physical Review B 1994 50, 16861.
